# Supplementary material
Source: PubMed Central journal article supplement (PMC4732960)
Supplement: supp_150601_150601-res-1-at.pdf [file supp_150601_150601-res-1-at.pdf]

**Appendix 1 (as supplied by the authors):** Antimicrobial prescribing for urinary tract infection (UTI), before, during and after the intervention in the three study arms

|                              | <b>Arm A</b> |              |           | <b>Arm B</b> |              |           | <b>Control</b> |              |           |
|------------------------------|--------------|--------------|-----------|--------------|--------------|-----------|----------------|--------------|-----------|
|                              | Before       | Intervention | Follow up | Before       | Intervention | Follow up | Before         | Intervention | Follow up |
| <b>UTI consultations (N)</b> | 381          | 743          | 211       | 309          | 738          | 178       | 360            | 783          | 441       |
|                              | %            | %            |           | %            | %            |           | %              | %            |           |
| <b>Antimicrobial</b>         | 63.3         | 78.6         | 83.4      | 69.9         | 75.6         | 73.9      | 68.6           | 66.5         | 66.9      |
|                              | 58.4-68.1    | 75.6-81.6    | 78.4-88.5 | 64.8-75.1    | 72.7-78.8    | 68.3-79.5 | 63.8-73.4      | 63.2-69.9    | 62.5-71.3 |
| <b>Difference</b>            |              | 15.3         |           |              | 5.7          |           |                | -2.1         |           |
|                              |              | 9.4-21.2     |           |              | -0.5-11.9    |           |                | -3.9-8.1     |           |
| <b>First line</b>            | 45.4         | 68.2         | 66.8      | 49.8         | 66.5         | 60.6      | 45.8           | 44.1         | 51.4      |
|                              | 40.4-50.4    | 64.9-71.6    | 60.4-73.2 | 44.2-55.4    | 63.1-69.9    | 54.4-66.8 | 40.7-51.0      | 40.9-47.6    | 46.8-56.2 |
| <b>Difference</b>            |              | 22.8         |           |              | 16.7         |           |                | -1.7         |           |
|                              |              | 14.7-30.9    |           |              | 9.9-23.5     |           |                | -4.7-8.1     |           |
| <b>Nitrofurantoin</b>        | 26.8         | 64.3         | 63.5      | 31.1         | 63.8         | 57.3      | 35.0           | 35.9         | 47.8      |
|                              | 22.3-31.2    | 60.9-67.8    | 57.0-70.1 | 25.9-36.3    | 60.4-67.3    | 51.0-63.6 | 30.1-40.0      | 32.5-39.3    | 43.2-52.5 |
| <b>Difference</b>            |              | 37.5         |           |              | 32.7         |           |                | 0.9          |           |
|                              |              | 29.9-45.1    |           |              | 26.3-39.2    |           |                | -5.3-7.1     |           |
| <b>Trimethoprim</b>          | 18.6         | 3.9          | 3.3       | 18.8         | 2.7          | 3.3       | 10.8           | 8.2          | 3.6       |
|                              | 14.7-22.6    | 2.5-5.3      | 0.8-5.6   | 14.4-23.2    | 1.5-3.9      | 1.0-5.6   | 7.6-14.1       | 6.3-10.1     | 1.9-5.4   |
| <b>Difference</b>            |              | -14.7        |           |              | -16.1        |           |                | -2.6         |           |
|                              |              | -10.3- -19.1 |           |              | -11.4- -20.8 |           |                | -1.3-6.5     |           |
| <b>Quinolones</b>            | 3.4          | 2.6          | 4.7       | 2.6          | 2.2          | 2.1       | 8.9            | 6.6          | 3.9       |
|                              | 1.6-5.2      | 1.4-3.7      | 1.9-7.6   | 0.8-4.4      | 1.1-3.2      | 0.3-3.9   | 5.9-11.8       | 4.9-8.4      | 2.0-5.7   |
| <b>Difference</b>            |              | 0.8          |           |              | -0.4         |           |                | -2.3         |           |
|                              |              | -1.1-3.3     |           |              | -1.9-2.7     |           |                | -2.4-7.0     |           |
| <b>Co-amoxyclav</b>          | 10.0         | 5.0          | 6.2       | 12.3         | 3.3          | 6.6       | 8.9            | 10.3         | 4.8       |
|                              | 7.0-13.0     | 3.4-6.6      | 2.9-9.4   | 8.6-16.0     | 2.0-4.5      | 3.5-9.8   | 5.9-11.8       | 8.2-12.5     | 2.8-6.8   |
| <b>Difference</b>            |              | -5.0         |           |              | -9.0         |           |                | -1.4         |           |
|                              |              | -1.4- -8.6   |           |              | 4.9-13.1     |           |                | -2.4-5.2     |           |
